# Supplementary material for: Genome-Wide Association Study Reveals Candidate Genes Involved in Fruit Trait Variation in Persian Walnut (Juglans regia L.)
Source: Frontiers journal article supplement (doi:10.3389/fpls.2020.607213), 2021-01-08

Nut Shape VA3D, MLMM (top) & FarmCPU (bottom), 2018

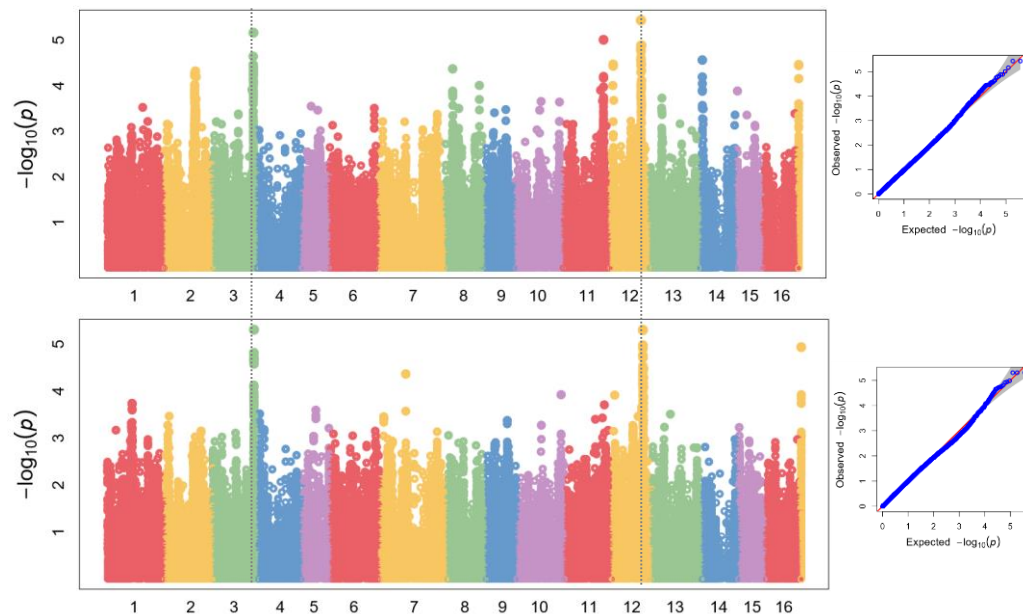

Nut Feret Shape 3D, MLMM (top) & FarmCPU (bottom), 2018

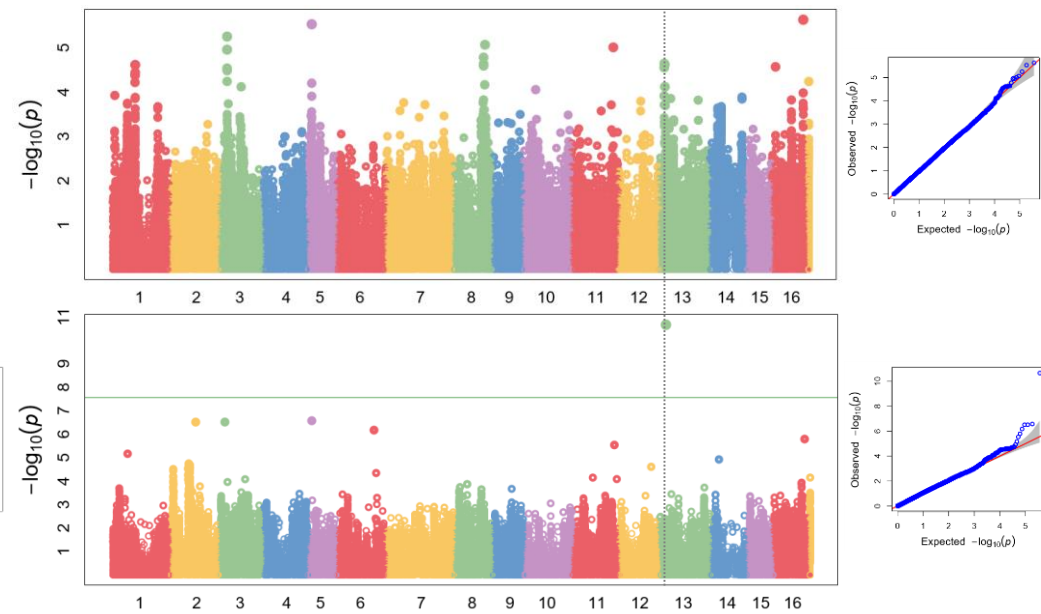

Nut Sphericity, MLMM (top) & FarmCPU (bottom), 2018

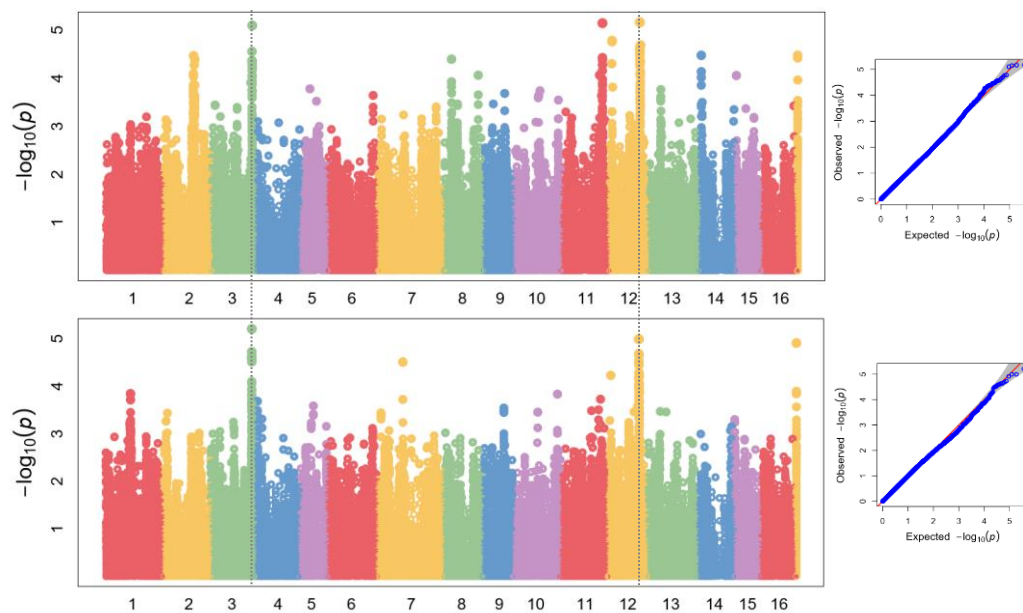

Shell Rugosity, MLMM (top) & FarmCPU (bottom), 2018

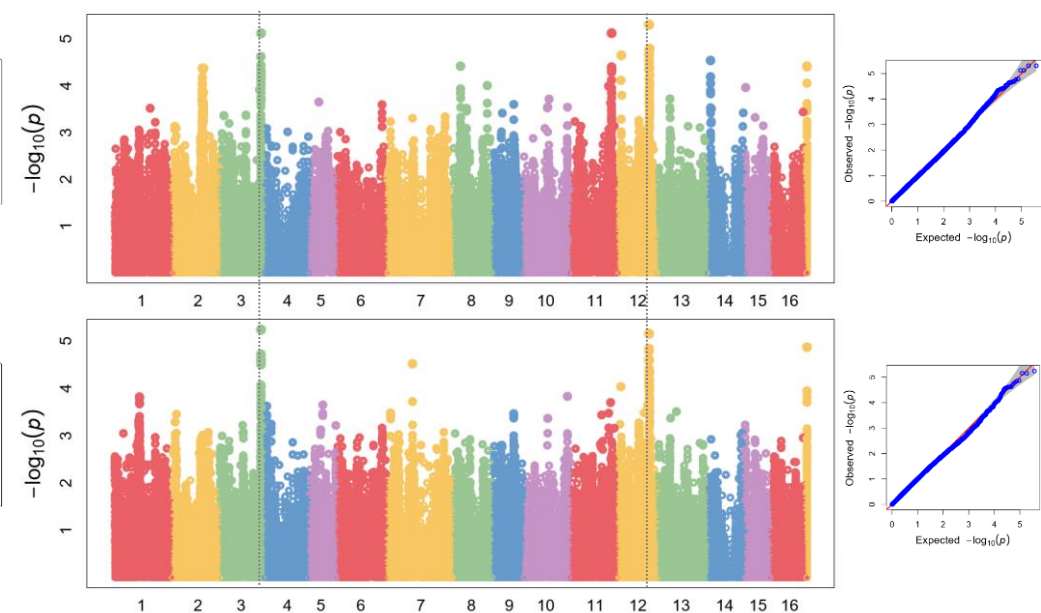

Nut Face Strength, MLMM (top) & FarmCPU (bottom), BLUPs 2017/2018/2019

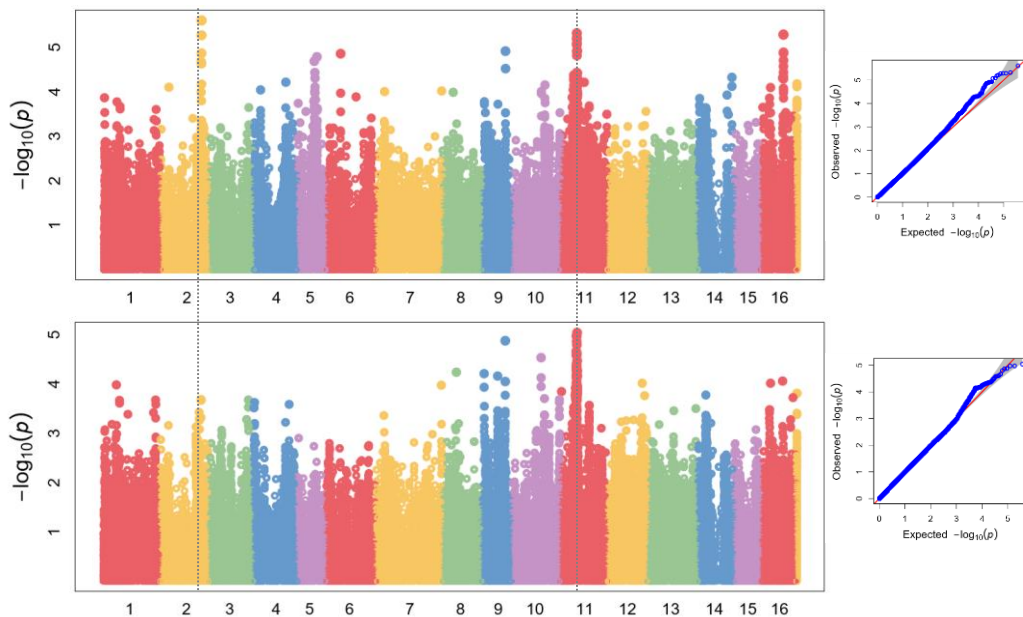

Nut Suture Strength, MLMM (top) & FarmCPU (bottom), BLUPs 2017/2018/2019

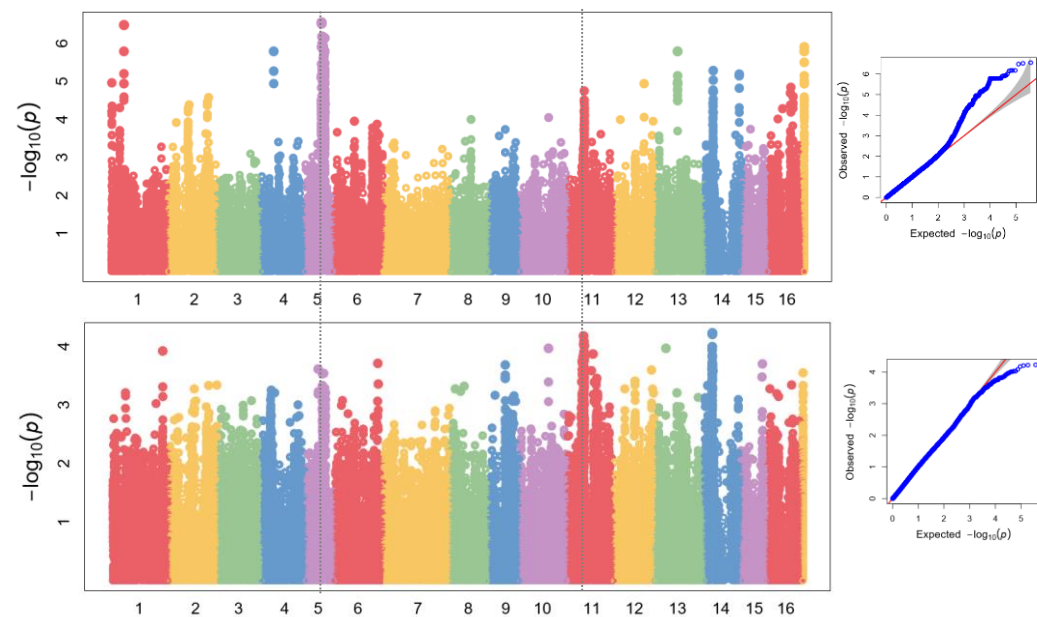

Shell Thickness, MLMM (top) & FarmCPU (bottom), 2018

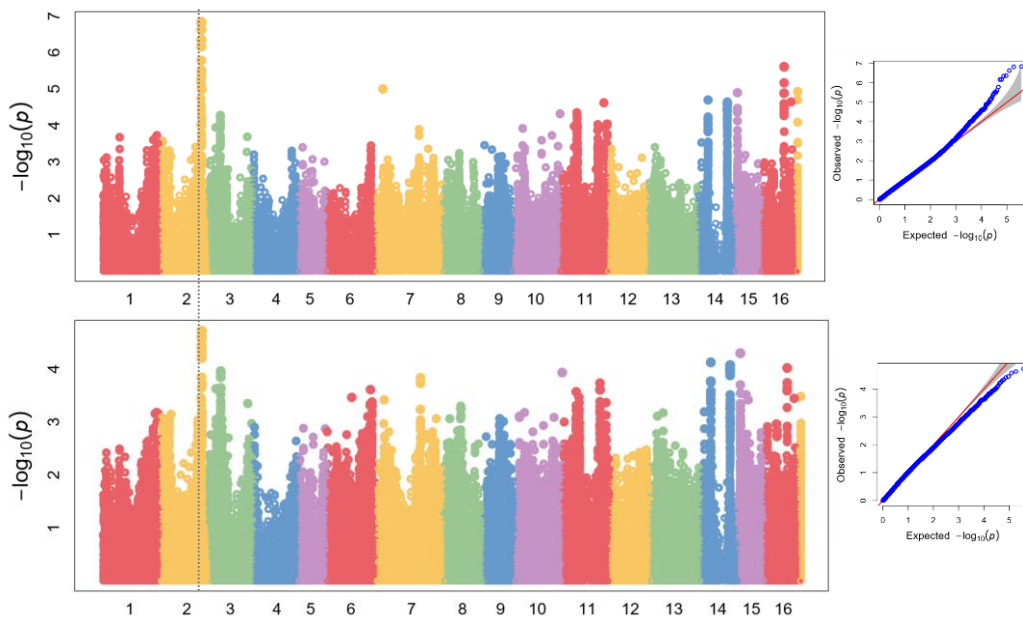

Saturated FA, MLMM (top) & FarmCPU (bottom), 2018

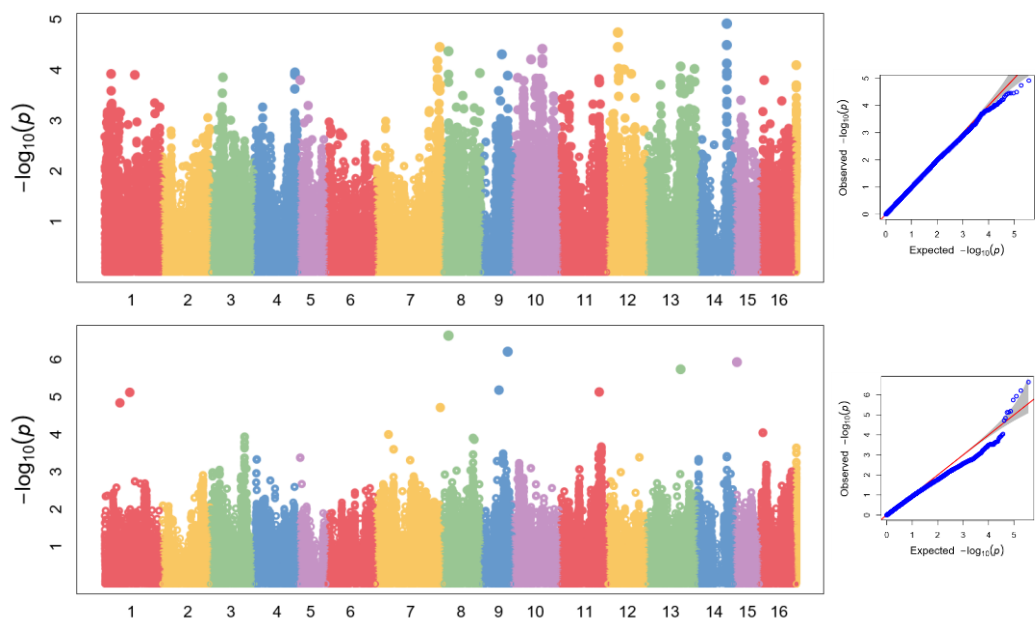

Polyunsat. FA, MLMM (top) & FarmCPU (bottom), 2018

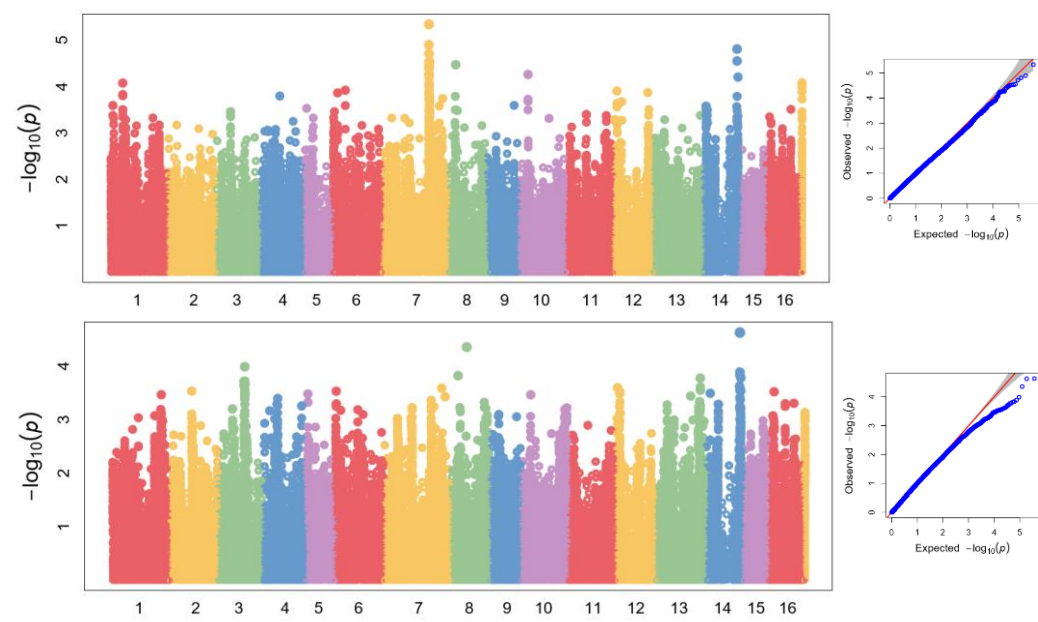

Monounsatur. FA, MLMM (top) & FarmCPU (bottom), 2018

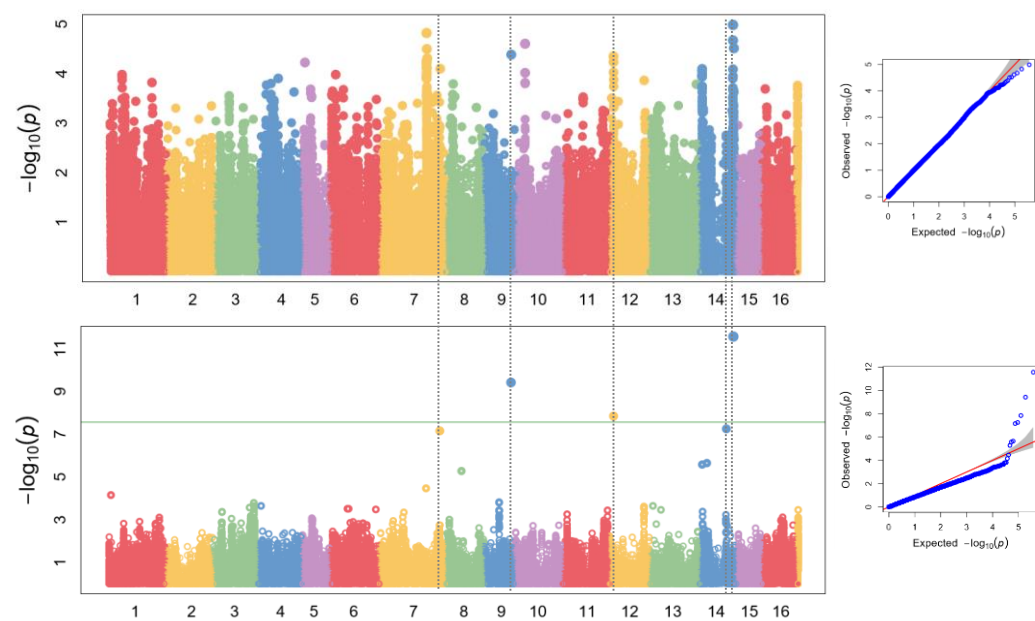

Tocopherols, MLMM (top) & FarmCPU (bottom), 2018

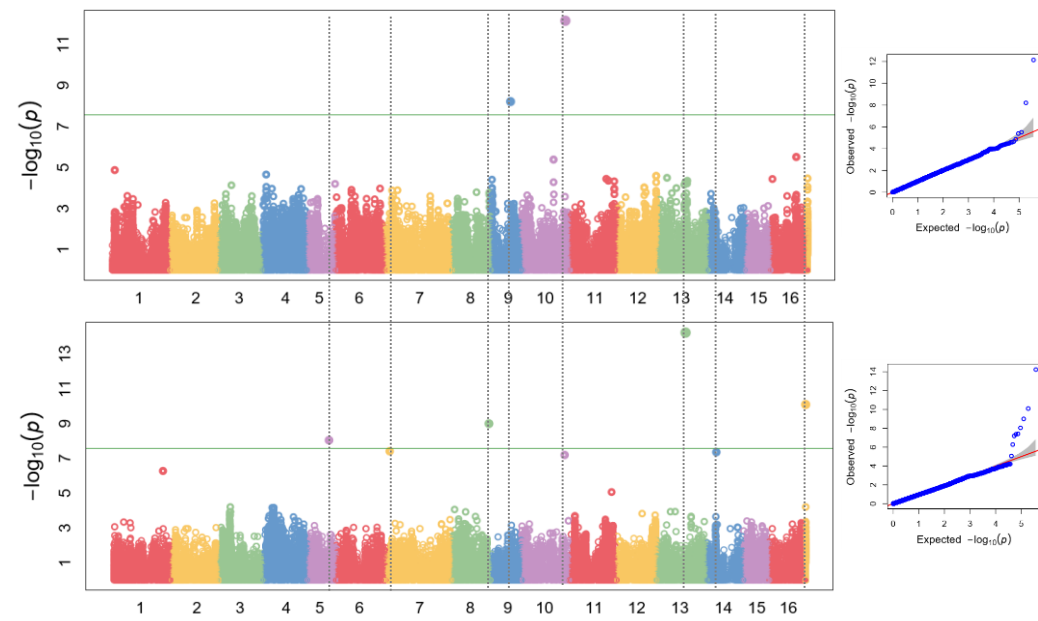

Vit. E Activity, MLMM (top) & FarmCPU (bottom), 2018

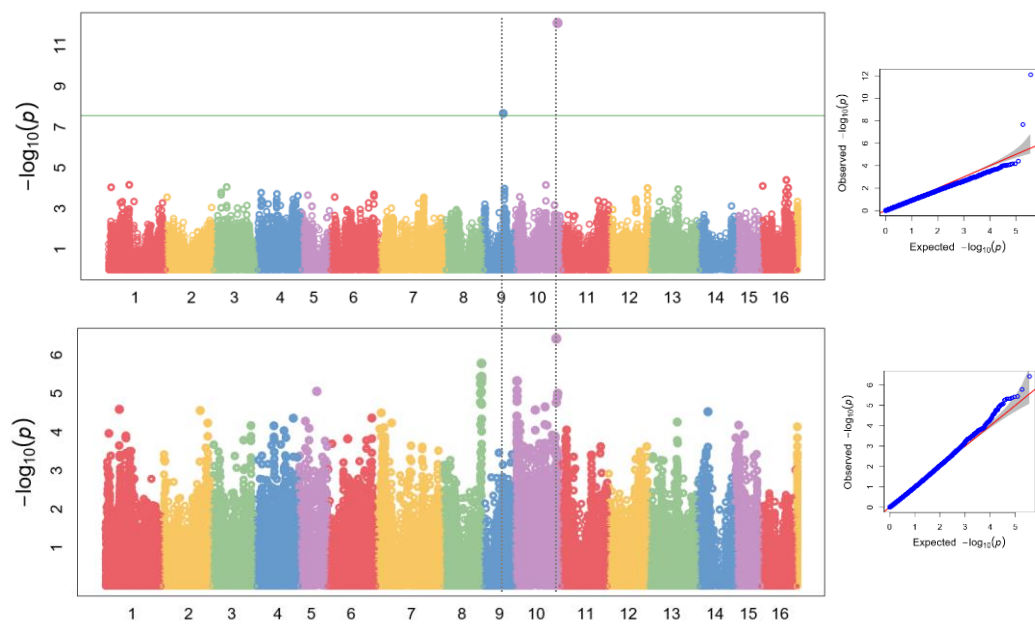

Supplement: Data_Sheet_2.PDF [file Data_Sheet_2.PDF]
